# Supplementary material
Source: PubMed Central journal article supplement (PMC5576555)
Supplement: NIHMS893421-supplement.pdf [file NIHMS893421-supplement.pdf]

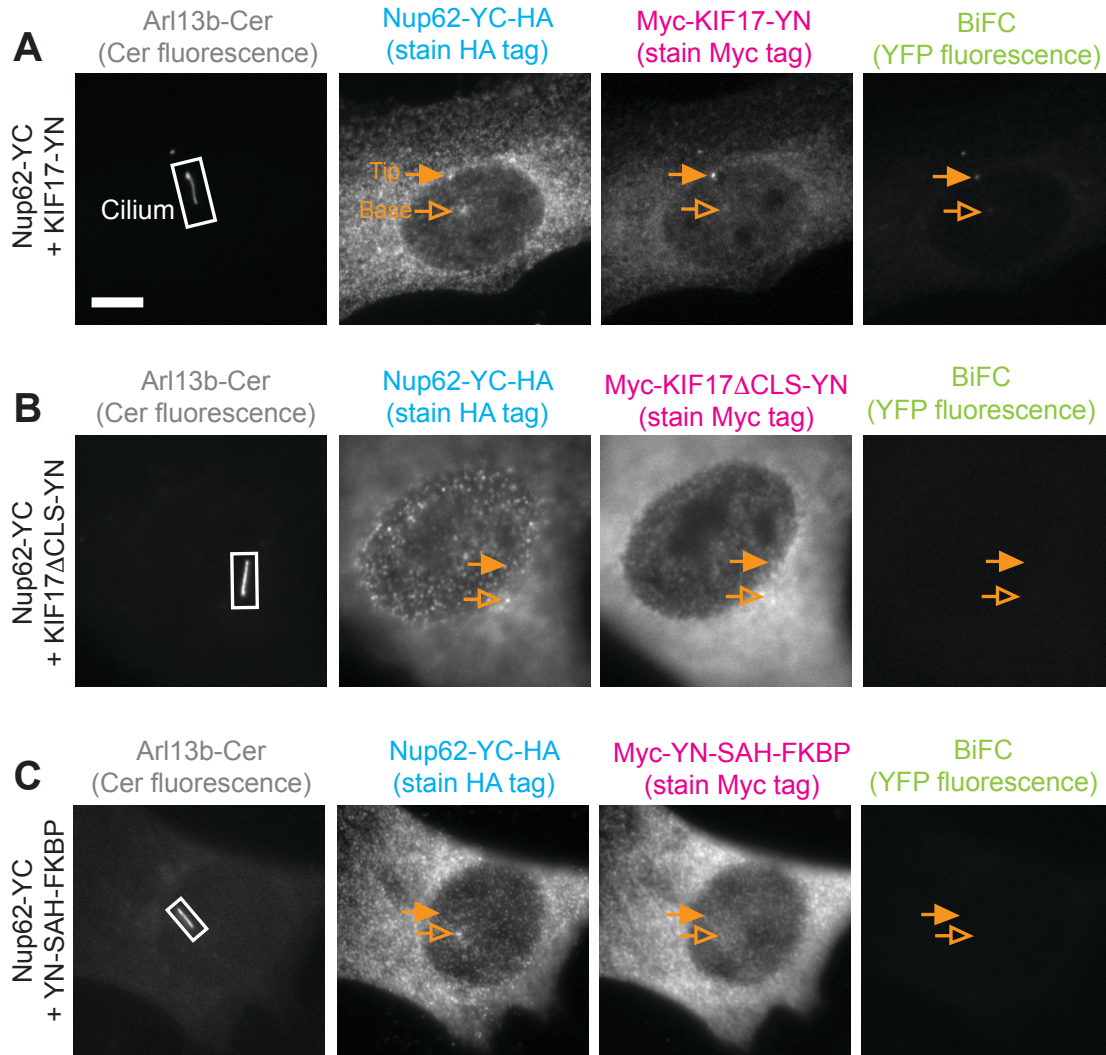

**Figure S1. BiFC interactions between NUP62 and transiting KIF17 or control proteins, Related to Figure 1.** (A-C) uncropped images of cells shown in Figure 1C-E. Proteins were detected with antibodies to the epitope tags. Scale bar, 5  $\mu$ m. Filled arrows indicate the tip of the cilium, open arrows indicate the base of the cilium.

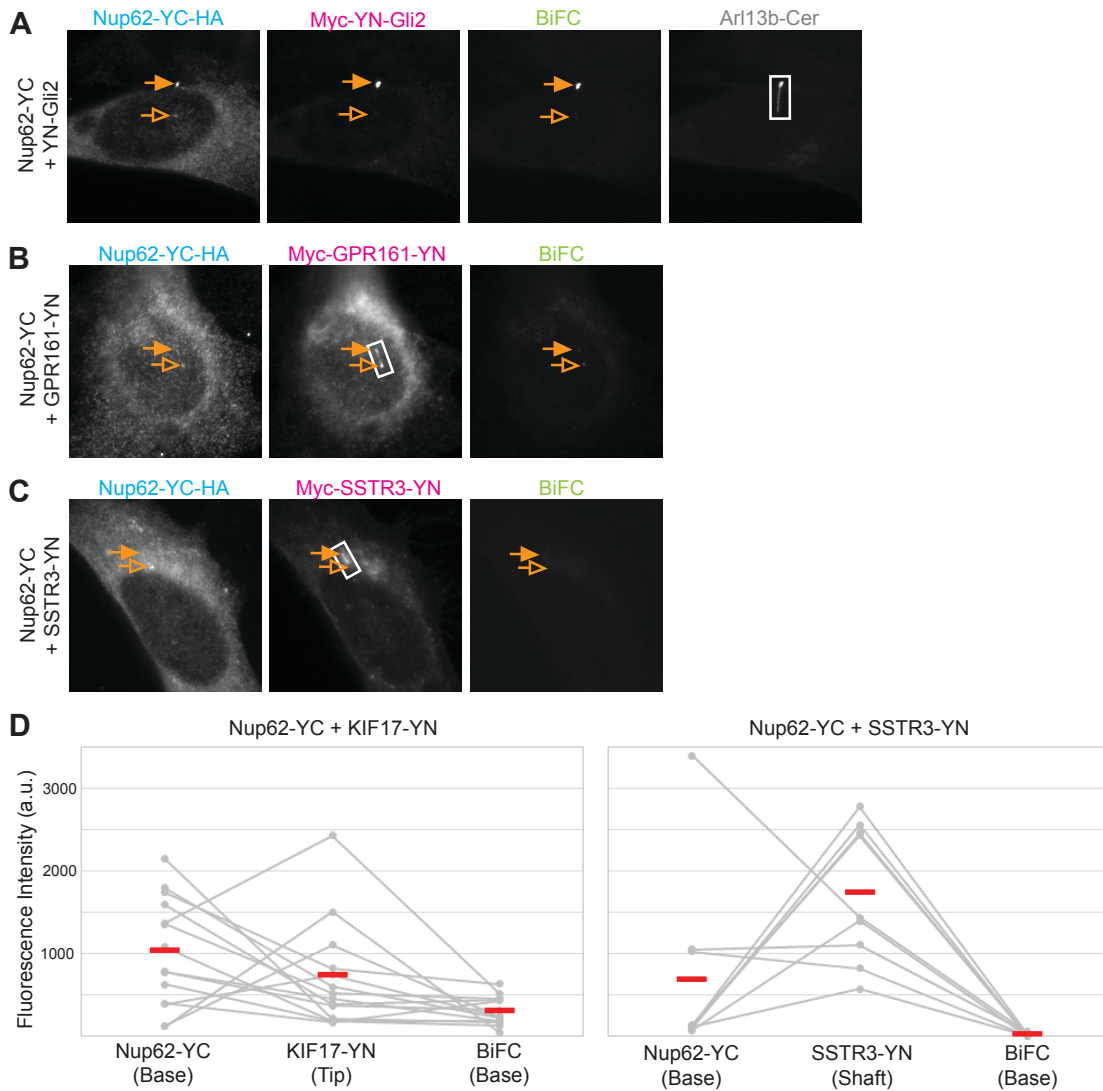

**Figure S2. BiFC interactions between Nup62 and transiting cilia proteins, Related to Figure 2.** (A-C) uncropped images of cells shown in Figure 2B-D. Proteins were detected with antibodies to the HA or Myc epitope tags. Scale bar, 5  $\mu$ m. Filled arrows indicate the tip of the cilium, open arrows indicate the base of the cilium. (D) BiFC interactions are independent of protein expression level. Quantification of the fluorescence intensities of Nup62-YC and the transiting proteins KIF17-YN (left, scored as 10/11 positive for BiFC at the base in Figure 2E) or SSTR3-YN (right, scored as 0/9 positive for BiFC at the base in Figure 2E). For each measurement (Nup62-YC, KIF17-YN, SSTR3-YN, and BiFC), the fluorescence intensities measured in individual cells are shown as dots and the measurements for each cell are connected by a line. The red bars indicate the mean fluorescence intensity across all cells. a.u. = arbitrary units. By using the same imaging conditions across experiments, the units are comparable between the various panels and figures.

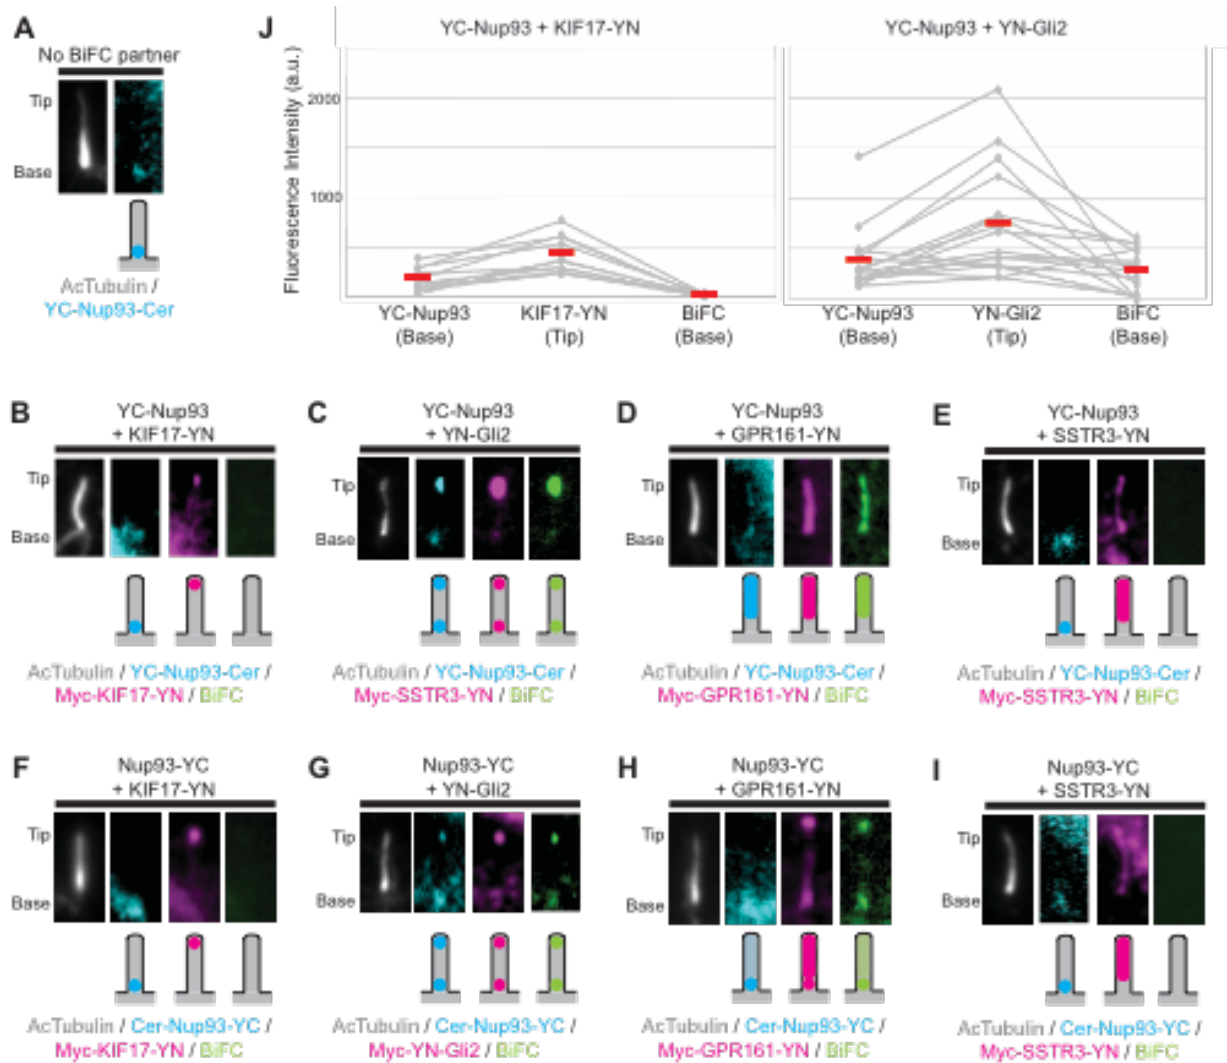

**Figure S3. BiFC interactions between Nup93 and transiting cilia proteins, Related to Figure 2.** (A) Representative image of the primary cilium and schematic depiction of YC-Nup93 localization in the absence of a BiFC partner. (B-E) Representative images and schematic depictions of all BiFC interactions tested for YC-NUP93. (F-I) Representative images and schematic depictions of all BiFC interactions tested for NUP93-YC. (J) BiFC interactions are independent of protein expression level. Quantification of the fluorescence intensities of YC-Nup93 and the transiting proteins KIF17-YN (left graph, scored as 0/10 positive for BiFC at the base in Figure 2F) or YN-Gli2 (right graph, scored as 11/17 positive for BiFC at the base in Figure 2F). For each measurement (YC-Nup93, KIF17-YN, YN-Gli2, and BiFC), the fluorescence intensities measured in individual cells are shown as dots and the measurements for each cell are connected by a line. The red bars indicate the mean fluorescence intensity across all cells. a.u. = arbitrary units. By using the same imaging conditions across experiments, the units are comparable between the various panels and figures.

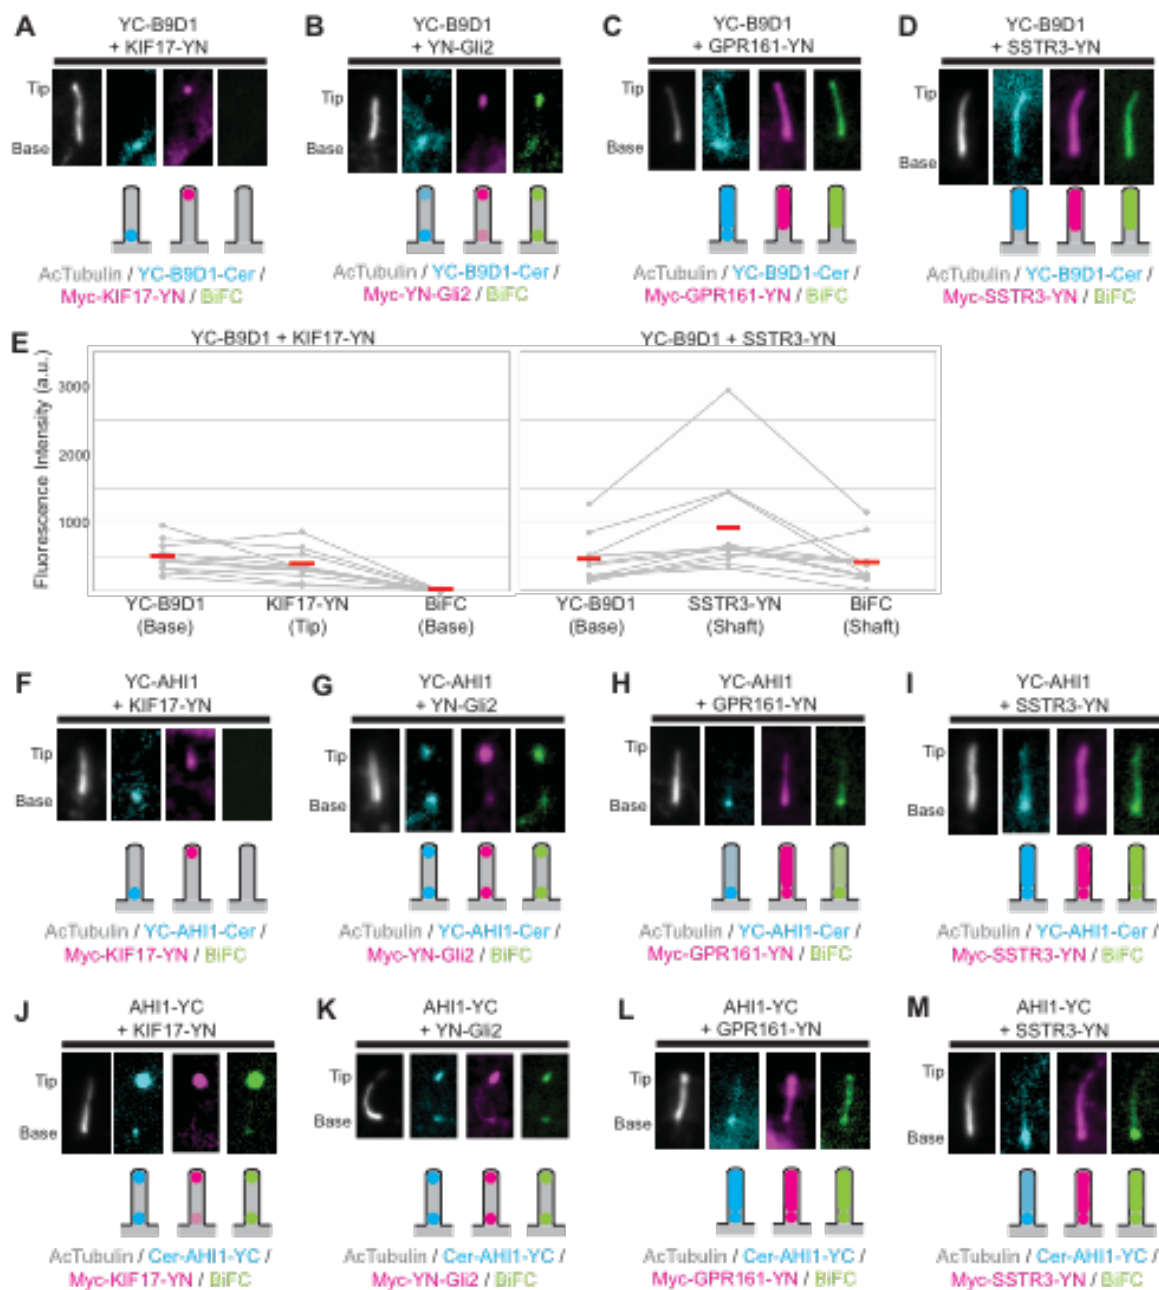

**Figure S4. BiFC interactions between MKS components and transiting cilia proteins, Related to Figure 3.** (A-D) Shown are representative images of the primary cilium for all BiFC interactions tested for YC-B9D1. (E) BiFC interactions are independent of protein expression level. Quantification of the fluorescence intensities of YC-B9D1 and the transiting proteins KIF17-YN (left graph, scored as 0/11 positive for BiFC at the base in Figure 3E) or SSTR3-YN (right graph, scored as 10/11 positive for BiFC in the shaft in Figure 3E). For each measurement (YC-Nup93, KIF17-YN, SSTR3-YN, and BiFC), the fluorescence intensities measured in individual cells are shown as dots and the measurements for each cell are connected by a line. The red bars indicate the mean fluorescence intensity across all cells. a.u. = arbitrary units. By using the same imaging conditions across experiments, the units are comparable between the various panels and figures. (F-M) Shown are representative images of the primary cilium for all BiFC interactions tested for (F-I) YC-AHI1 or (J-M) AHI1-YC. Some of these images are also shown in Figure 3A-D.



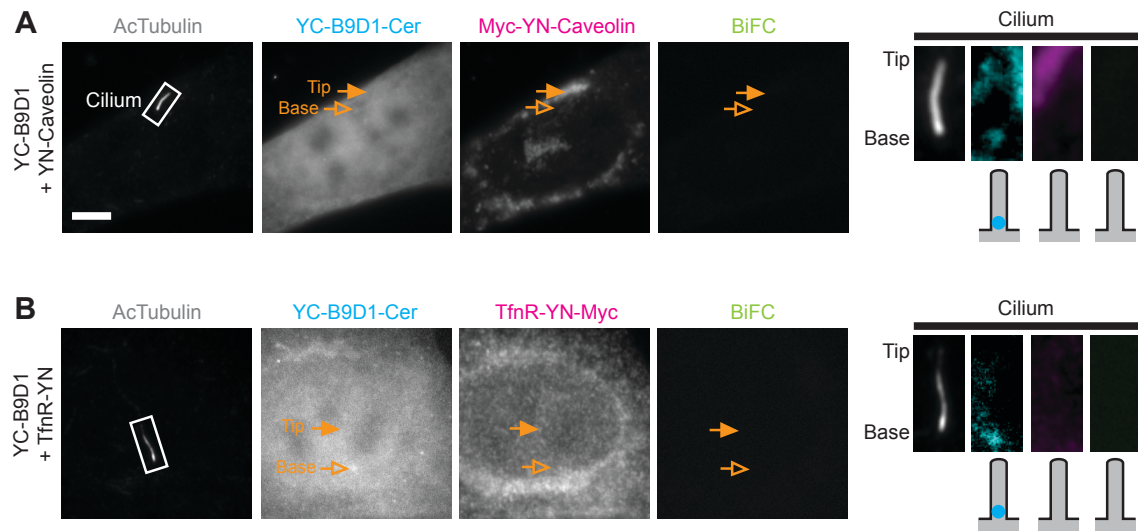

**Figure S5. BiFC controls for B9D1 and non-ciliary transmembrane proteins, Related to Figure 3.** No BiFC interactions were detected between YC-B9D1 and the non-ciliary proteins (A) YN-Caveolin or (B) TfnR-YN ( $n = 10$  cells each, graphs not shown). Representative images of the entire cells and cropped regions containing the cilium are shown. Scale bar,  $5 \mu\text{m}$ .

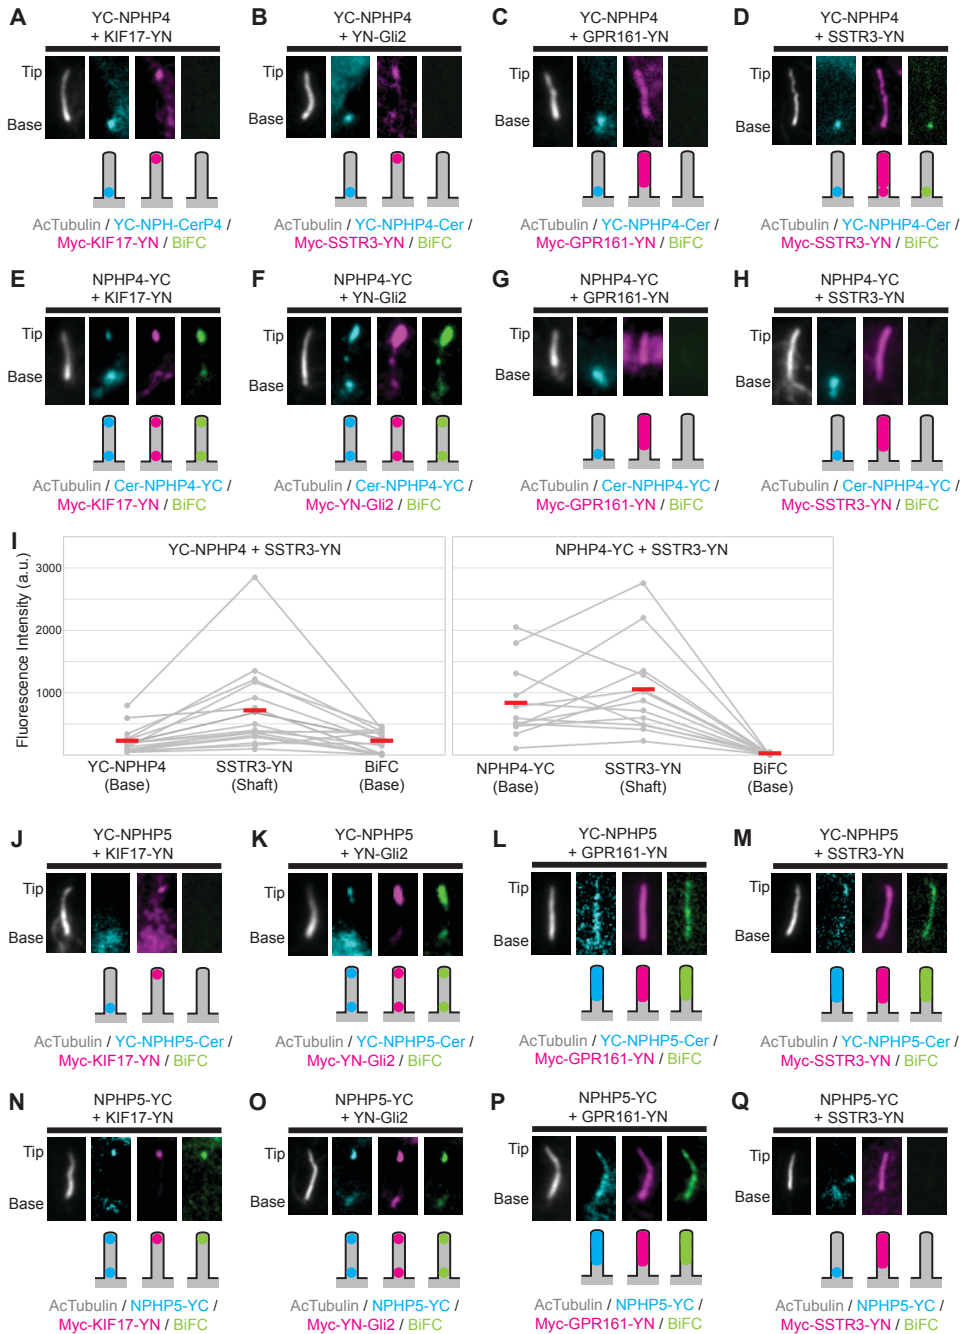

**Figure S6. BiFC interactions between NPHP components and transiting cilia proteins, Related to Figure 4.** (A-H) Shown are representative images of the primary cilium for all BiFC interactions tested for (A-D) YC-NPHP4 and (E-H) NPHP4-YC. (I) BiFC interactions are independent of protein expression level. Quantification of the fluorescence intensities of the transiting protein SSTR3-YN with YC-NPHP4 (left graph, scored as 11/17 positive for BiFC at the base in Figure 4E) or with NPHP4-YC (right graph, scored as 0/13 positive for BiFC at the base in Figure 4E). For each measurement (YC-NPHP4, NPHP4-YC, SSTR3-YN, and BiFC), the fluorescence intensities measured in individual cells are shown as dots and the measurements for each cell are connected by a line. The red bars indicate the mean fluorescence intensity across all cells. a.u. = arbitrary units. By using the same imaging conditions across experiments, the units are comparable between the various panels and figures. (J-Q) Shown are representative images of the primary cilium for all BiFC interactions tested for (J-M) YC-NPHP5 or (N-Q) NPHP5-YC.

**Table S1, Related to Figures 1-4. List of BiFC constructs**

| <b>Class</b>  | <b>Name in main text</b> | <b>Full name of construct</b> | <b>YFP fragment</b> | <b>Other tag</b> | <b>Relevant Figureures</b> |
|---------------|--------------------------|-------------------------------|---------------------|------------------|----------------------------|
| Soluble       | KIF17-YN                 | Myc-KIF17-YN                  | mCitrine(1-172)     | Myc              | Figures 1-4                |
| Soluble       | YN-Gli2                  | Myc-YN-Gli2                   | mCitrine(1-172)     | Myc              | Figures 1-4                |
| Soluble       | KIF17DCLS-YN             | Myc-KIF17 $\Delta$ CLS-YN     | mCitrine(1-172)     | Myc              | Figure 1D,F                |
| Soluble       | YN-SAH-FKBP              | Myc-YN-SAH-FKBP               | mCitrine(1-172)     | Myc              | Figure 1E,F                |
| Transmembrane | GPR161-YN                | Myc-GPR161-YN                 | mCitrine(1-172)     | Myc              | Figures 2-4                |
| Transmembrane | SSTR3-YN                 | Myc-SSTR3-YN                  | mCitrine(1-172)     | Myc              | Figures 2-4                |
| Transmembrane | YN-Caveolin              | Myc-YN-Caveolin               | mCitrine(1-172)     | Myc              | Figure S5A                 |
| Transmembrane | TfnR-YN                  | TfnR-YN-Myc                   | mCitrine(1-172)     | Myc              | Figure S5B                 |
| NUP           | Nup62-YC                 | Nup62-YC-HA                   | Venus(155-238)      | HA               | Figures 1, 2               |
| NUP           | YC-Nup93                 | YC-Nup93-Cer                  | Venus(155-238)      | Cerulean         | Figure 2                   |
| NUP           | Nup93-YC                 | Cer-Nup93-YC                  | Venus(155-238)      | Cerulean         | Figure 2                   |
| MKS           | YC-B9D1                  | YC-B9D1-Cer                   | Venus(155-238)      | Cerulean         | Figure 3                   |
| MKS           | YC-AHI1                  | YC-AHI1-Cer                   | Venus(155-238)      | Cerulean         | Figure. 3                  |
| MKS           | AHI1-YC                  | Cer-AHI1-YC                   | Venus(155-238)      | Cerulean         | Figure 3                   |
| NPHP          | YC-NPHP4                 | YC-NPHP4-Cer                  | Venus(155-238)      | Cerulean         | Figure 4                   |
| NPHP          | NPHP4-YC                 | Cer-NPHP4-YC                  | Venus(155-238)      | Cerulean         | Figure 4                   |
| NPHP          | YC-NPHP5                 | YC-NPHP5-Cer                  | Venus(155-238)      | Cerulean         | Figure 4                   |
| NPHP          | NPHP5-YC                 | Cer-NPHP5-YC                  | Venus(155-238)      | Cerulean         | Figure 4                   |
